# Supplementary material for: Prediction of a planar BxP monolayer with inherent metallicity and its potential as an anode material for Na and K-ion batteries: a first-principles study
Source: Royal Society of Chemistry journal article supplement (doi:10.1039/d3cp03438k), 2023-01-01
Supplement: d3cp03438k1.pdf [file d3cp03438k1.pdf]

## Supporting information

### Prediction of planar B<sub>x</sub>P Monolayer with inherent metallicity and its potential as an anode material for Na and K-Ion Batteries: A First-Principles Study

Fang Liu<sup>b</sup>, Xianfei Chen<sup>a,b\*</sup>, Yi Huang<sup>a\*</sup>, Chaozhu Shu<sup>a,b</sup>, Na Li<sup>c</sup>, Beibei Xiao<sup>d</sup>, Lianli Wang<sup>e</sup>

<sup>a</sup> State Key Laboratory of Geohazard Prevention and Geoenvironment Protection, Chengdu University of Technology, Chengdu 610059, China

<sup>b</sup> College of Materials and Chemistry & Chemical Engineering, Chengdu University of Technology, Chengdu 610059, China

<sup>c</sup> College of Energy resources, state key laboratory of Oil and Gas Reservoir Geology and Exploitation, Chengdu University of Technology, Chengdu 610059, China

<sup>d</sup> School of Energy and Power Engineering, Jiangsu University of Science and Technology, Zhenjiang 212003, China

<sup>e</sup> School of Materials Science and Engineering, Xi'an University of Science and Technology, Xi'an 710054, China

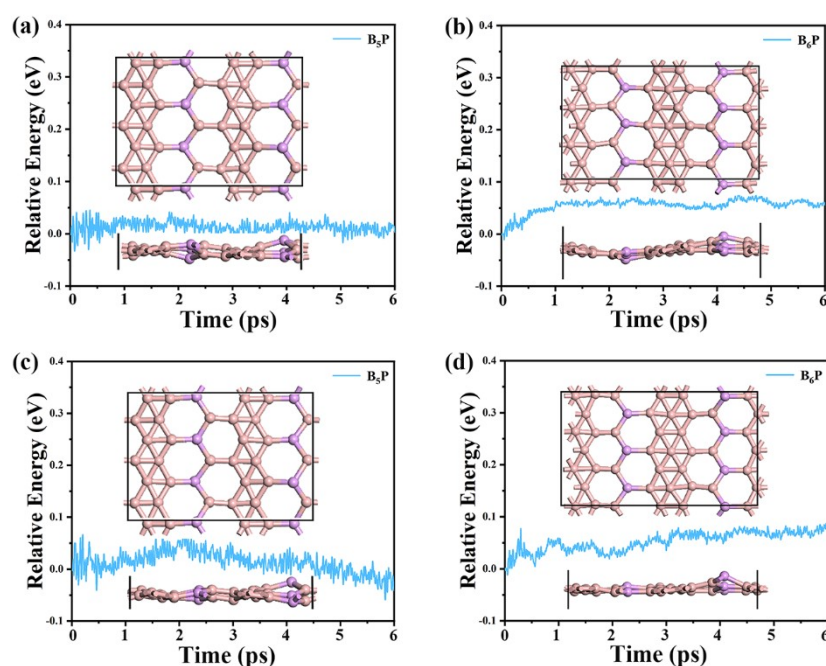

Figure S1. The energy evolution of (a) B<sub>5</sub>P and (b) B<sub>6</sub>P during the AIMD simulations at 300 K, as well as the energy variation of (c) B<sub>5</sub>P and (d) B<sub>6</sub>P simulated at 600 K. The energy of the initial configuration at 0 ps was set to be zero. The inset gives the configuration at the end of the simulation.

\* Corresponding author. Email: [chenxianfei2014@cdut.edu.cn](mailto:chenxianfei2014@cdut.edu.cn); [huangyi@cdut.cn](mailto:huangyi@cdut.cn)

Table S1 The calculated adsorption energies ( $E_{ad}$  in eV) for all considered adsorption sites of Na/K ion. The final adsorption sites of the Na/K ions after geometric optimization are shown in parentheses.

| Site | B <sub>3</sub> P |            | B <sub>6</sub> P |            |
|------|------------------|------------|------------------|------------|
|      | Na               | K          | Na               | K          |
| B1   | -1.40 (H1)       | -1.83 (H1) | -1.37 (H2)       | -1.94 (H1) |
| B2   | -1.38 (H1)       | -1.57 (H1) | -1.39 (H2)       | -1.90 (H2) |
| B3   | -1.08 (H2)       | -1.82 (H1) | -1.50 (H1)       | -1.98 (H1) |
| B4   | -1.37 (H1)       | -1.83 (H1) | -1.47 (H1)       | -1.94 (H1) |
| B5   | -1.37 (H1)       | -1.57 (H1) | -1.39 (H2)       | -1.89 (H2) |
| B6   | -1.14 (H1)       | -1.62 (H1) | -1.39 (H2)       | -1.89 (H2) |
| B7   | -1.39 (H2)       | -1.81 (H2) | -1.48 (H1)       | -1.94 (H1) |
| B8   | -1.25 (H1)       | -1.55 (H1) | -1.52 (H1)       | -1.95 (H1) |
| B9   |                  |            | -1.43 (H1)       | -1.90 (H1) |
| B10  |                  |            | -1.53 (H1)       | -1.98 (H1) |
| H1   | -1.07 (H1)       | -1.84 (H1) | -1.49 (H1)       | -1.96 (H1) |
| H2   | -1.14 (H2)       | -1.78 (H2) | -1.40 (H2)       | -1.90 (H2) |
| H3   | -1.24 (H1)       | -1.82 (H1) | -1.41 (H2)       | -1.91 (T1) |
| H4   | -1.08 (H1)       | -1.80 (H1) | -1.50 (H1)       | -1.97 (H1) |
| H5   |                  |            | -1.49 (H2)       | -1.98 (H1) |
| T1   | -1.39 (H1)       | -1.81 (H1) | -1.49 (H1)       | -1.97 (H1) |
| T2   | -1.39 (H1)       | -1.56 (H1) | -1.35 (H2)       | -1.87 (H2) |
| T3   | -1.38 (H1)       | -1.84 (H1) | -1.49 (H1)       | -1.66 (T3) |
| T4   | -1.25 (H2)       | 1.56 (H2)  | -1.50 (H1)       | -1.93 (H1) |
| T5   | -1.14 (H1)       | -1.53 (H1) | -1.51 (H1)       | -1.97 (H1) |
| T6   | -1.27 (H2)       | -1.79 (H2) | -1.40 (H2)       | -1.89 (H2) |
| T7   |                  |            | -1.50 (H1)       | -1.97 (H1) |
